# Supplementary material for: An imidazo[1,2-a]pyridine-functionalized xanthene fluorescent probe for naked-eye detection of Hg2+ and its application in cell imaging and test strips
Source: Royal Society of Chemistry journal article supplement (doi:10.1039/d4sd00090k), 2024-01-01
Supplement: d4sd00090k1.pdf [file d4sd00090k1.pdf]

*Supporting information*

**An imidazo[1,2-*a*]pyridine functionalized xanthene fluorescent probe for naked-eye detection of Hg<sup>2+</sup> and its application in cell imaging and test strips**

**Xu-Hong Han,<sup>a</sup> Piao Zhao,<sup>a</sup> Meng-Ke Tang,<sup>b</sup> Qing Wang<sup>\*b</sup> and Shu-Sheng Zhang<sup>\*b</sup>**

<sup>a</sup>*College of Chemistry and Chemical Engineering, Linyi University, Linyi 276005, PR China*

<sup>b</sup>*Shandong Provincial Key Laboratory of Detection Technology for Tumor Markers, School of Medicine, Linyi University, Linyi 276005, PR China*

\*Corresponding author, e-mail: [qing1016.hi@163.com](mailto:qing1016.hi@163.com); [shushzhang@126.com](mailto:shushzhang@126.com)

Table S1 Comparison of reported xanthene-based Hg<sup>2+</sup> fluorescent probe with **Rh-1p-Hy**.

| Probe                                                                               | Fluorescence Intensity change | LOD (mol/L)          | Solvent medium                                                    | pH range                                                                                                         | Application                     | Ref.      |
|-------------------------------------------------------------------------------------|-------------------------------|----------------------|-------------------------------------------------------------------|------------------------------------------------------------------------------------------------------------------|---------------------------------|-----------|
| 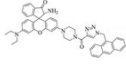   | Enhancement                   | 8.1×10 <sup>-7</sup> | H <sub>2</sub> O/CH <sub>3</sub> CN<br>(v: v = 1:1)               | 5-9                                                                                                              | Cell imaging                    | 1         |
|    | 55-fold enhancement           | 2.6×10 <sup>-6</sup> | H <sub>2</sub> O/CH <sub>3</sub> OH<br>(v: v = 1:1)               | 7-8<br>(when pH <6, the opening of the rhodamine ring occurs independently of the action of Hg <sup>2+</sup> )   | Cell imaging                    | 2         |
|    | Enhancement                   | 1.6×10 <sup>-8</sup> | H <sub>2</sub> O/C <sub>2</sub> H <sub>5</sub> OH<br>(v: v = 1:9) | 6-9<br>(when pH <6, the opening of the rhodamine ring occurs independently of the action of Hg <sup>2+</sup> )   | Water analysis                  | 3         |
|    | 354-fold enhancement          | 2.3×10 <sup>-8</sup> | PBS/DMSO<br>(v: v = 1:1)                                          | 5-8                                                                                                              | Cell imaging;<br>water analysis | 4         |
|    | 146-fold enhancement          | 2.0×10 <sup>-6</sup> | H <sub>2</sub> O/CH <sub>3</sub> CN<br>(v: v = 2:8)               | --                                                                                                               | Paper strip test                | 5         |
|    | Enhancement                   | 1.2×10 <sup>-7</sup> | PBS/C <sub>2</sub> H <sub>5</sub> OH<br>(v: v = 3:7)              | 6-7.5<br>(when pH <6, the opening of the rhodamine ring occurs independently of the action of Hg <sup>2+</sup> ) | Cell imaging                    | 6         |
|    | 30-fold enhancement           | 3.3×10 <sup>-7</sup> | H <sub>2</sub> O/C <sub>2</sub> H <sub>5</sub> OH<br>(v: v = 1:1) | 5-7<br>(when pH <5, the opening of the rhodamine ring occurs independently of the action of Hg <sup>2+</sup> )   | --                              | 7         |
|   | decrease                      | 2.5×10 <sup>-7</sup> | H <sub>2</sub> O                                                  | 2-12                                                                                                             | Water analysis                  | 8         |
|  | 65-fold enhancement           | 5.7×10 <sup>-8</sup> | H <sub>2</sub> O/C <sub>2</sub> H <sub>5</sub> OH<br>(v: v = 4:1) | 5-11                                                                                                             | Cell imaging;                   | This work |

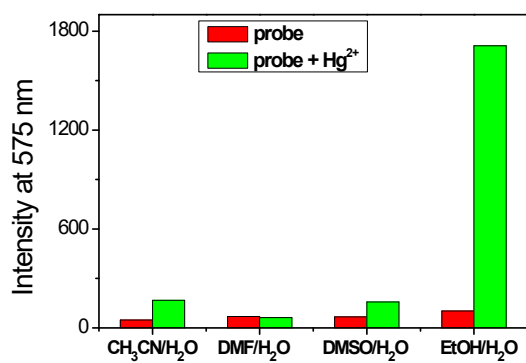

**Fig. S1** The fluorescent responses of **Rh-Ip-Hy** (5  $\mu$ M) with  $\text{Hg}^{2+}$  (50  $\mu$ M) in different solvent systems.

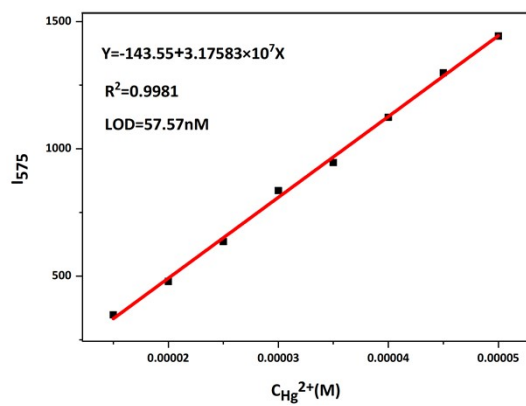

**Fig. S2** The limit of detection (LOD) of probe **Rh-Ip-Hy** towards  $\text{Hg}^{2+}$  by fluorescence measured at 575 nm.

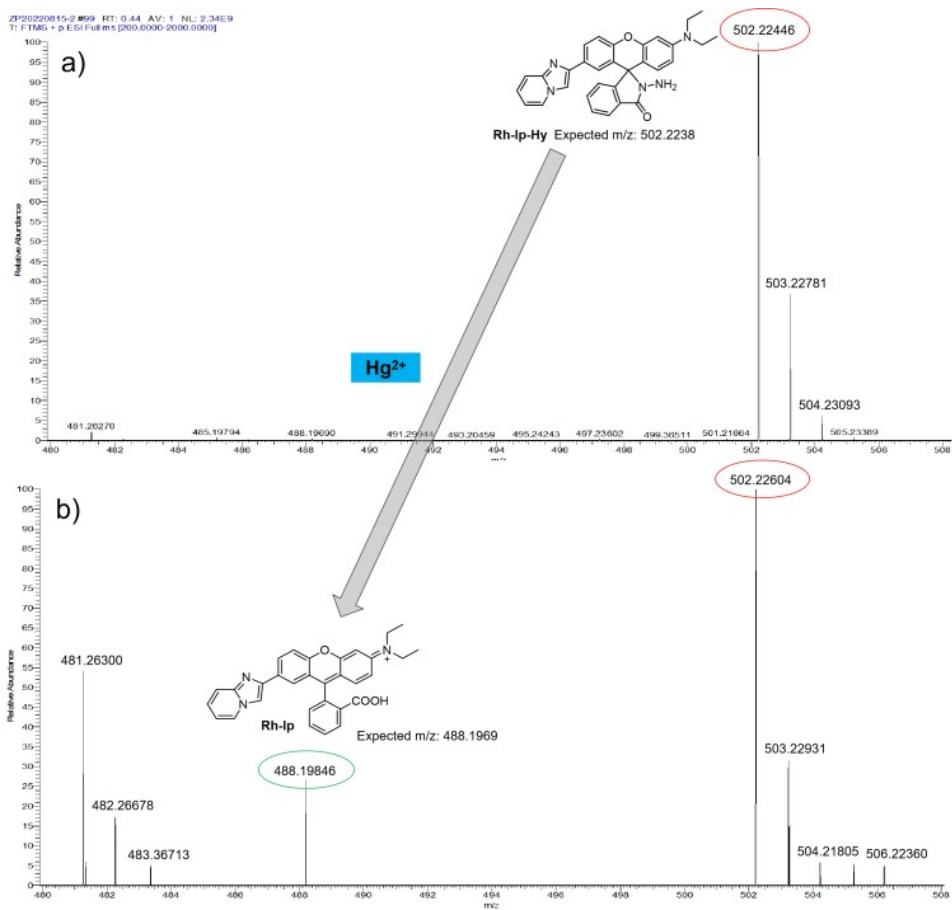

**Fig. S3** HRMS spectra of **Rh-Ip-Hy** a) before and b) after the addition of  $\text{Hg}^{2+}$  (3.0 equiv.).

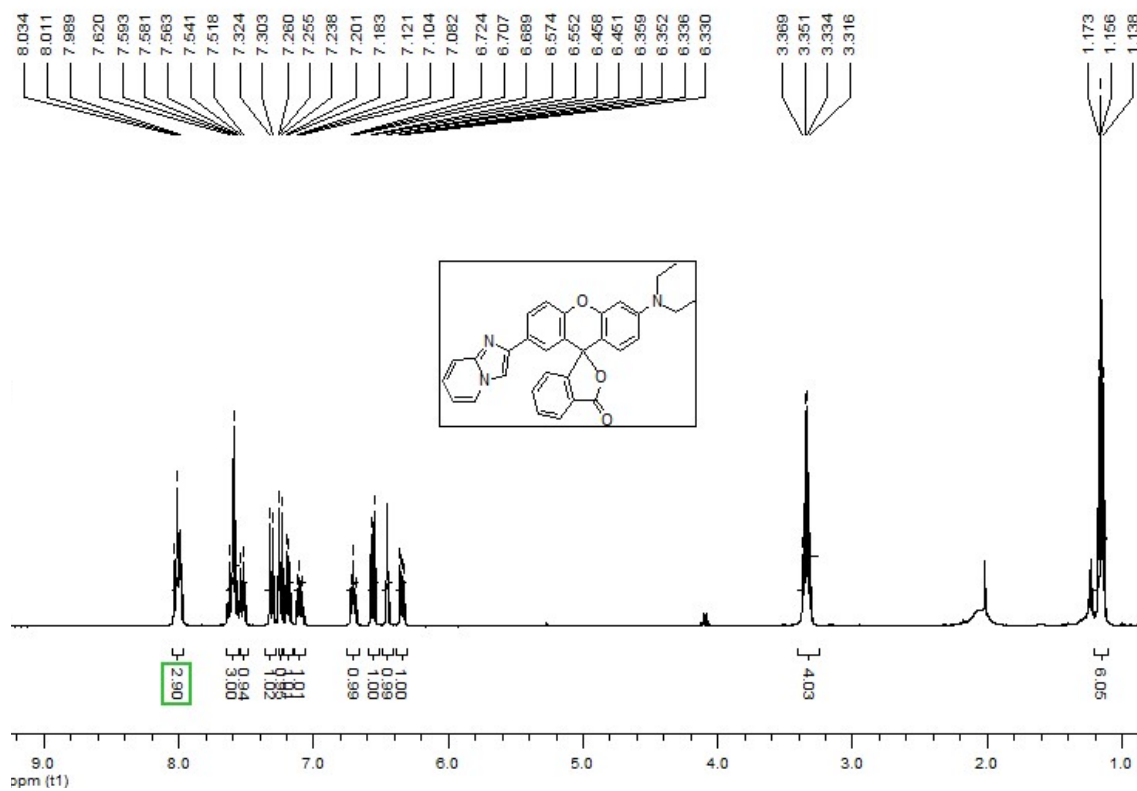

Fig. S4  $^1\text{H}$  NMR spectra of compound Rh-Ip in  $\text{CDCl}_3$ .

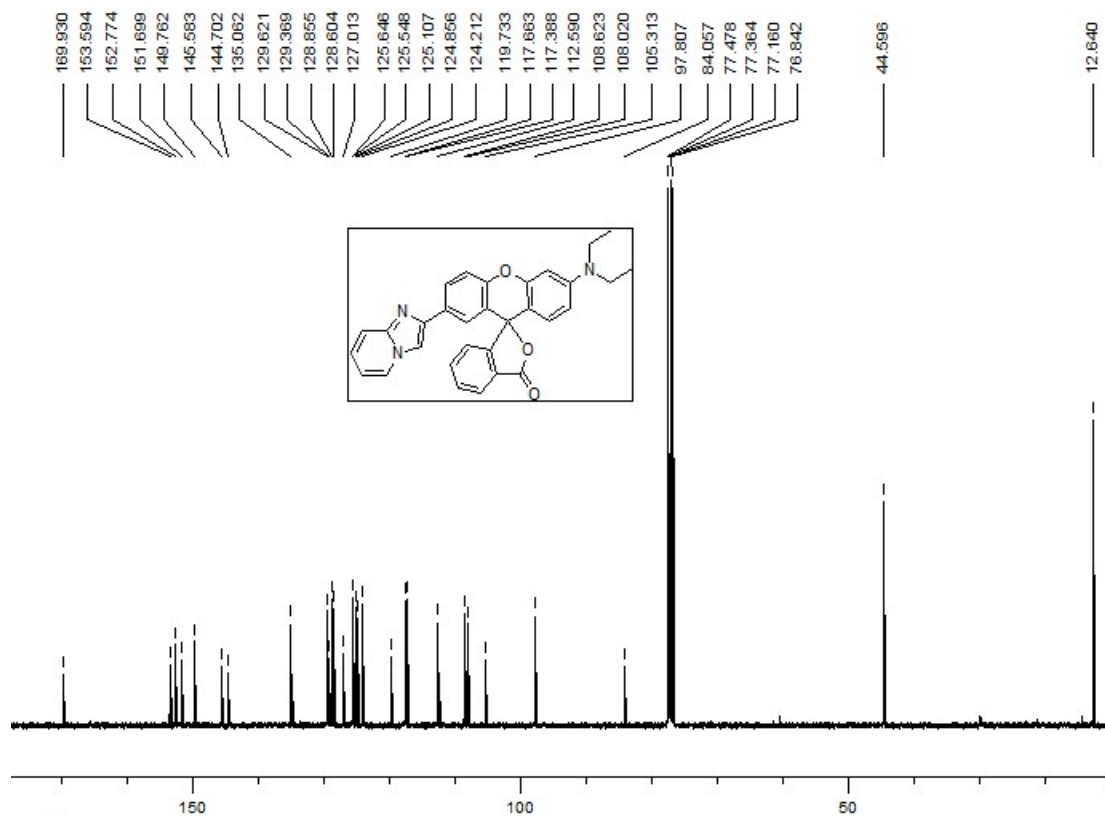

Fig. S5  $^{13}\text{C}$  NMR spectra of compound Rh-Ip in  $\text{CDCl}_3$ .

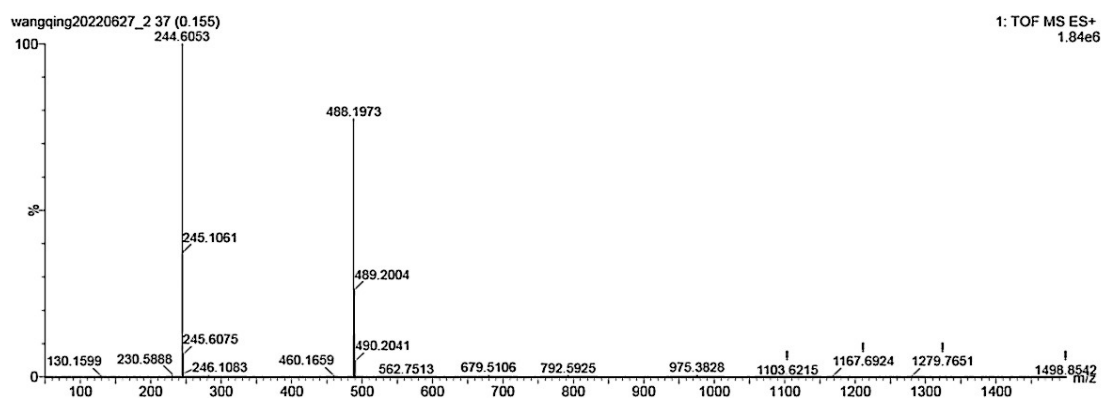

**Fig. S6** HRMS spectra of compound **Rh-Ip**.

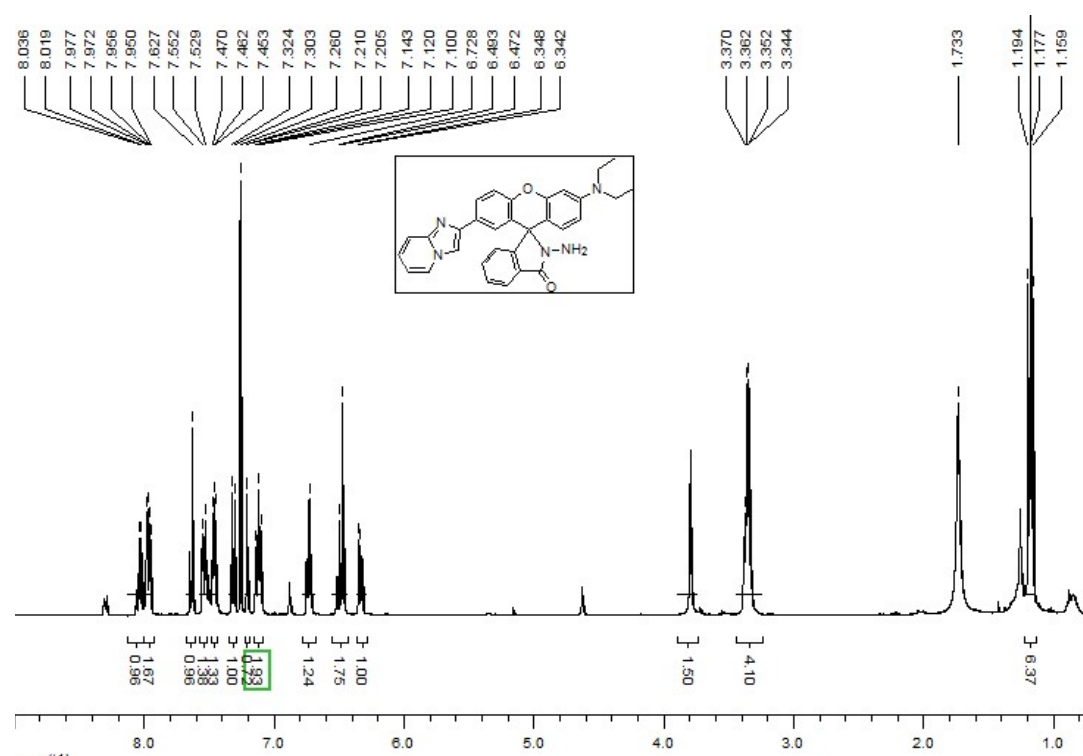

**Fig. S7**  $^1\text{H}$  NMR spectra of probe **Rh-Ip-Hy** in  $\text{CDCl}_3$ .

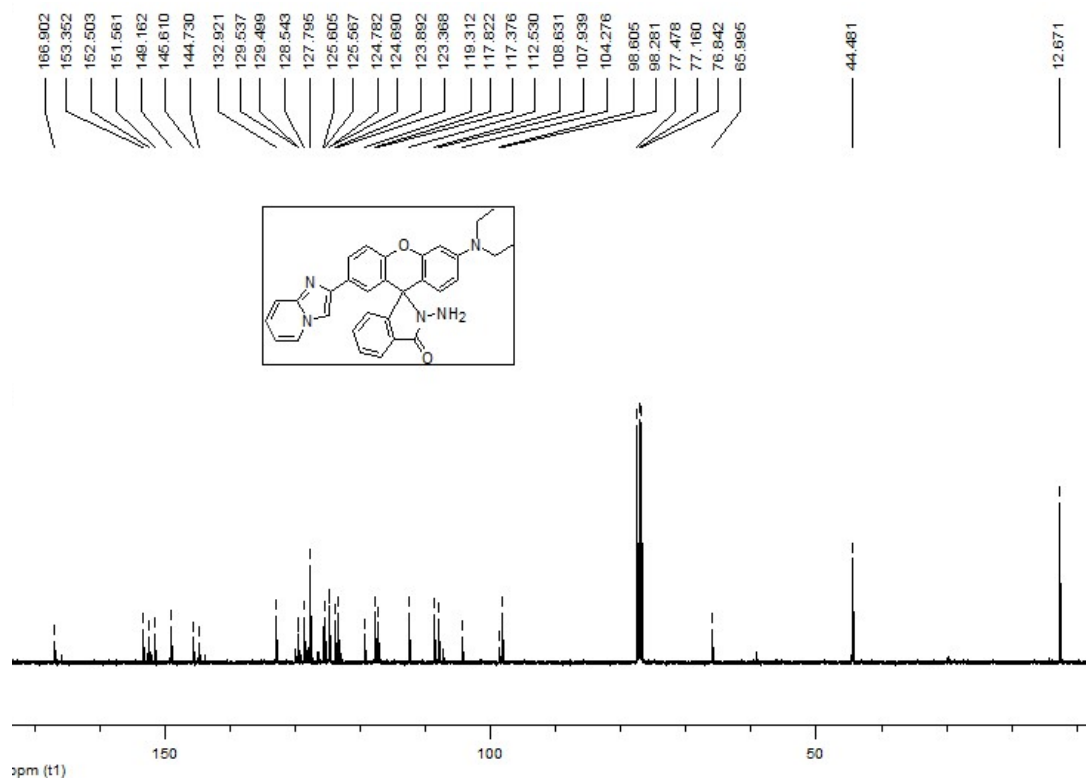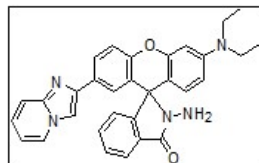

**Fig. S8**  $^{13}\text{C}$  NMR spectra of probe **Rh-Ip-Hy** in  $\text{CDCl}_3$ .

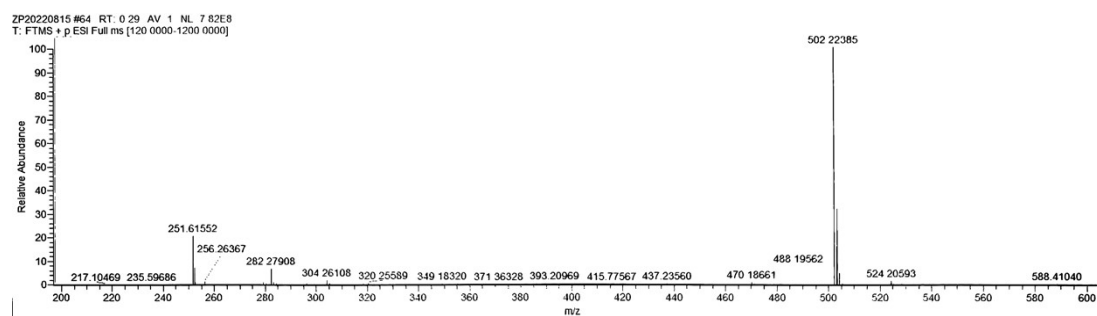

**Fig. S9** HRMS spectra of probe **Rh-Ip-Hy**.

## References

1. Q. Zhang, H. Ding, X. Xu, H. Wang, G. Liu and S. Pu, *Spectrochim. Acta. A Mol. Biomol. Spectrosc.*, 2022, **276**, 121242.

2. B. Li, F. Tian and Y. Hua, *RSC Adv.*, 2022, **12**, 21129-21134
3. A. Hazra, P. Ghosh and P. Roy, *Spectrochim. Acta. A Mol. Biomol. Spectrosc.*, 2022, **271**, 120905.
4. W. Lai, Y. Lin, T. Ye, Y. Yu, H. Zhou, L. Li, G. Mao and J. Wang, *J. Fluoresc.*, 2023, **33**, 1413-1419.
5. P. K. Sada, A. Bar, A. K. Jassal, A. K. Singh, L. Singh and A. Rai, *Anal. Chim. Acta.*, 2023, **1263**, 341299.
6. S. Erdemir, M. Oguz and M. Sait, *J. Hazard. Mater.*, 2023, **452**, 131278.
7. A. S. Hussein, F. Lafzi, S. Bayindir, H. Kilic and M. Toprak, *ChemPlusChem*, **2024**, e202300649.
8. Y. B. Barot, V. Anand and R. Mishra, *The Journal of Physical Chemistry B*, 2023, **127** (49): 10529-10541.
